# Supplementary material
Source: Research Square preprint supplement (doi:10.21203/rs.3.rs-9469245/v1)
Supplement: Supplementary file 1 [file 76cb8a80037e73f9066527e7.docx]

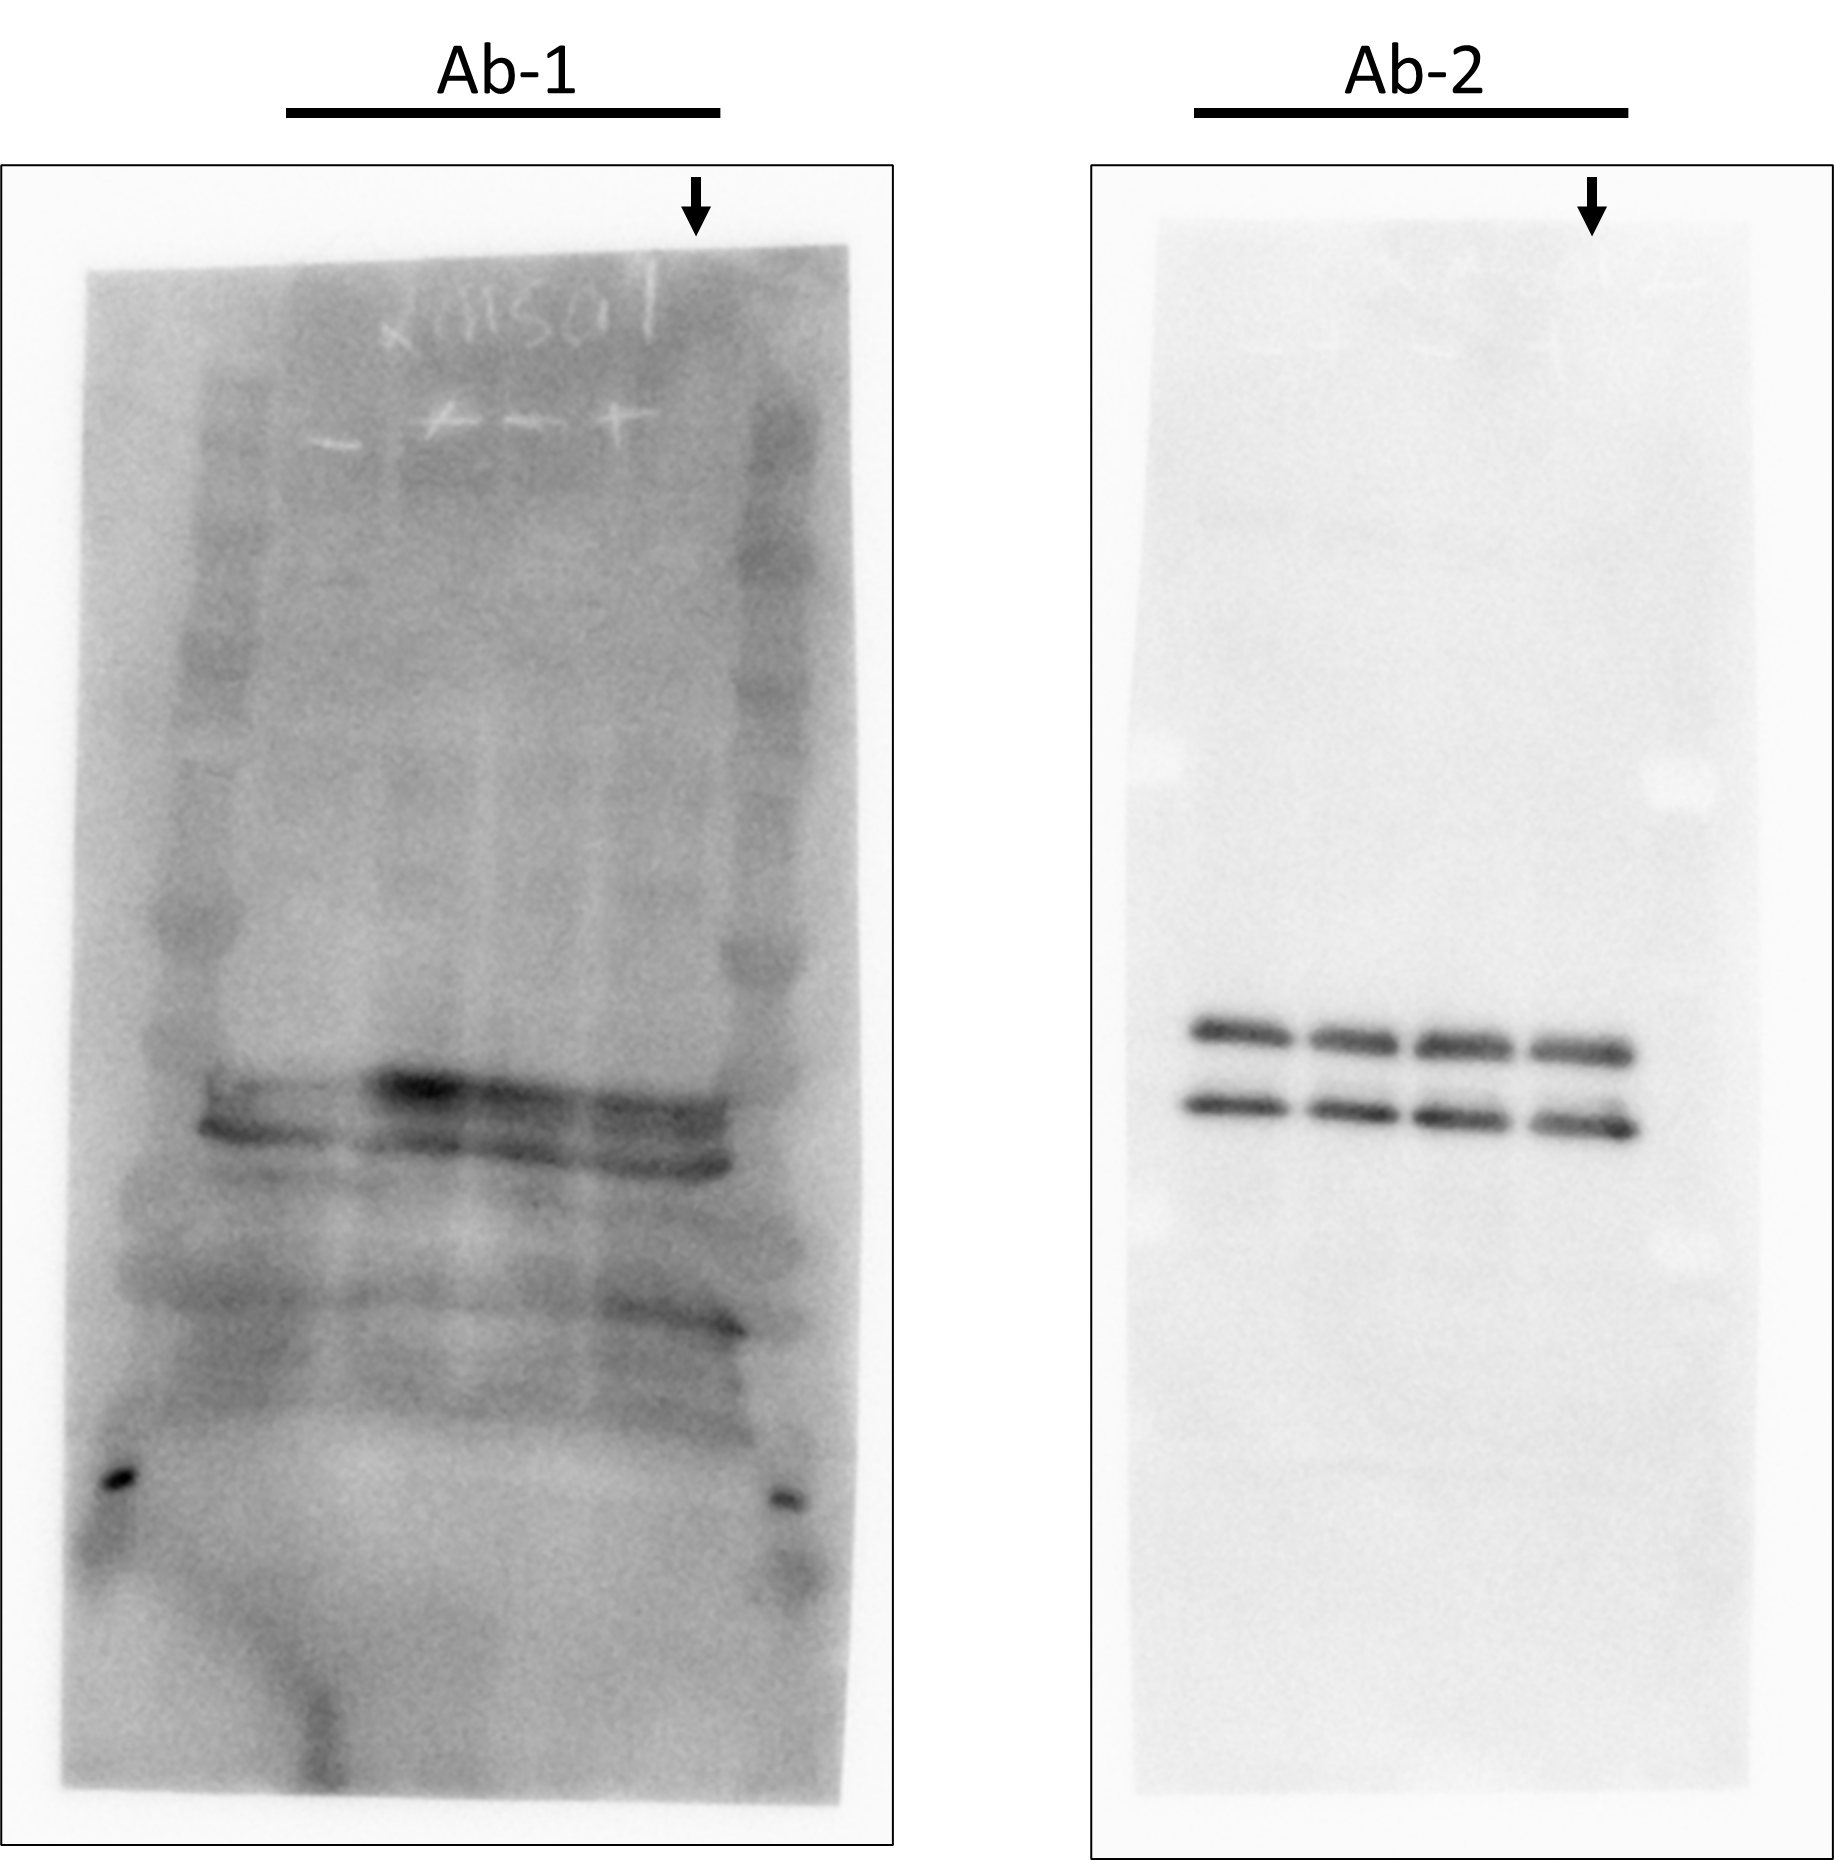


**Fig. S2. Full uncropped Western blots image**

Western blot analysis of MSA detected using two rabbit anti-MSA antibodies (Ab-1 and Ab-2), with four replicates. The fourth lane in each image (arrow) was used to generate the image shown in Figure 2.
