# Supplementary material
Source: Research Square preprint supplement (doi:10.21203/rs.3.rs-9469245/v1)
Supplement: Supplementary file 2 [file bd89bcbc1f12483806112282.docx]

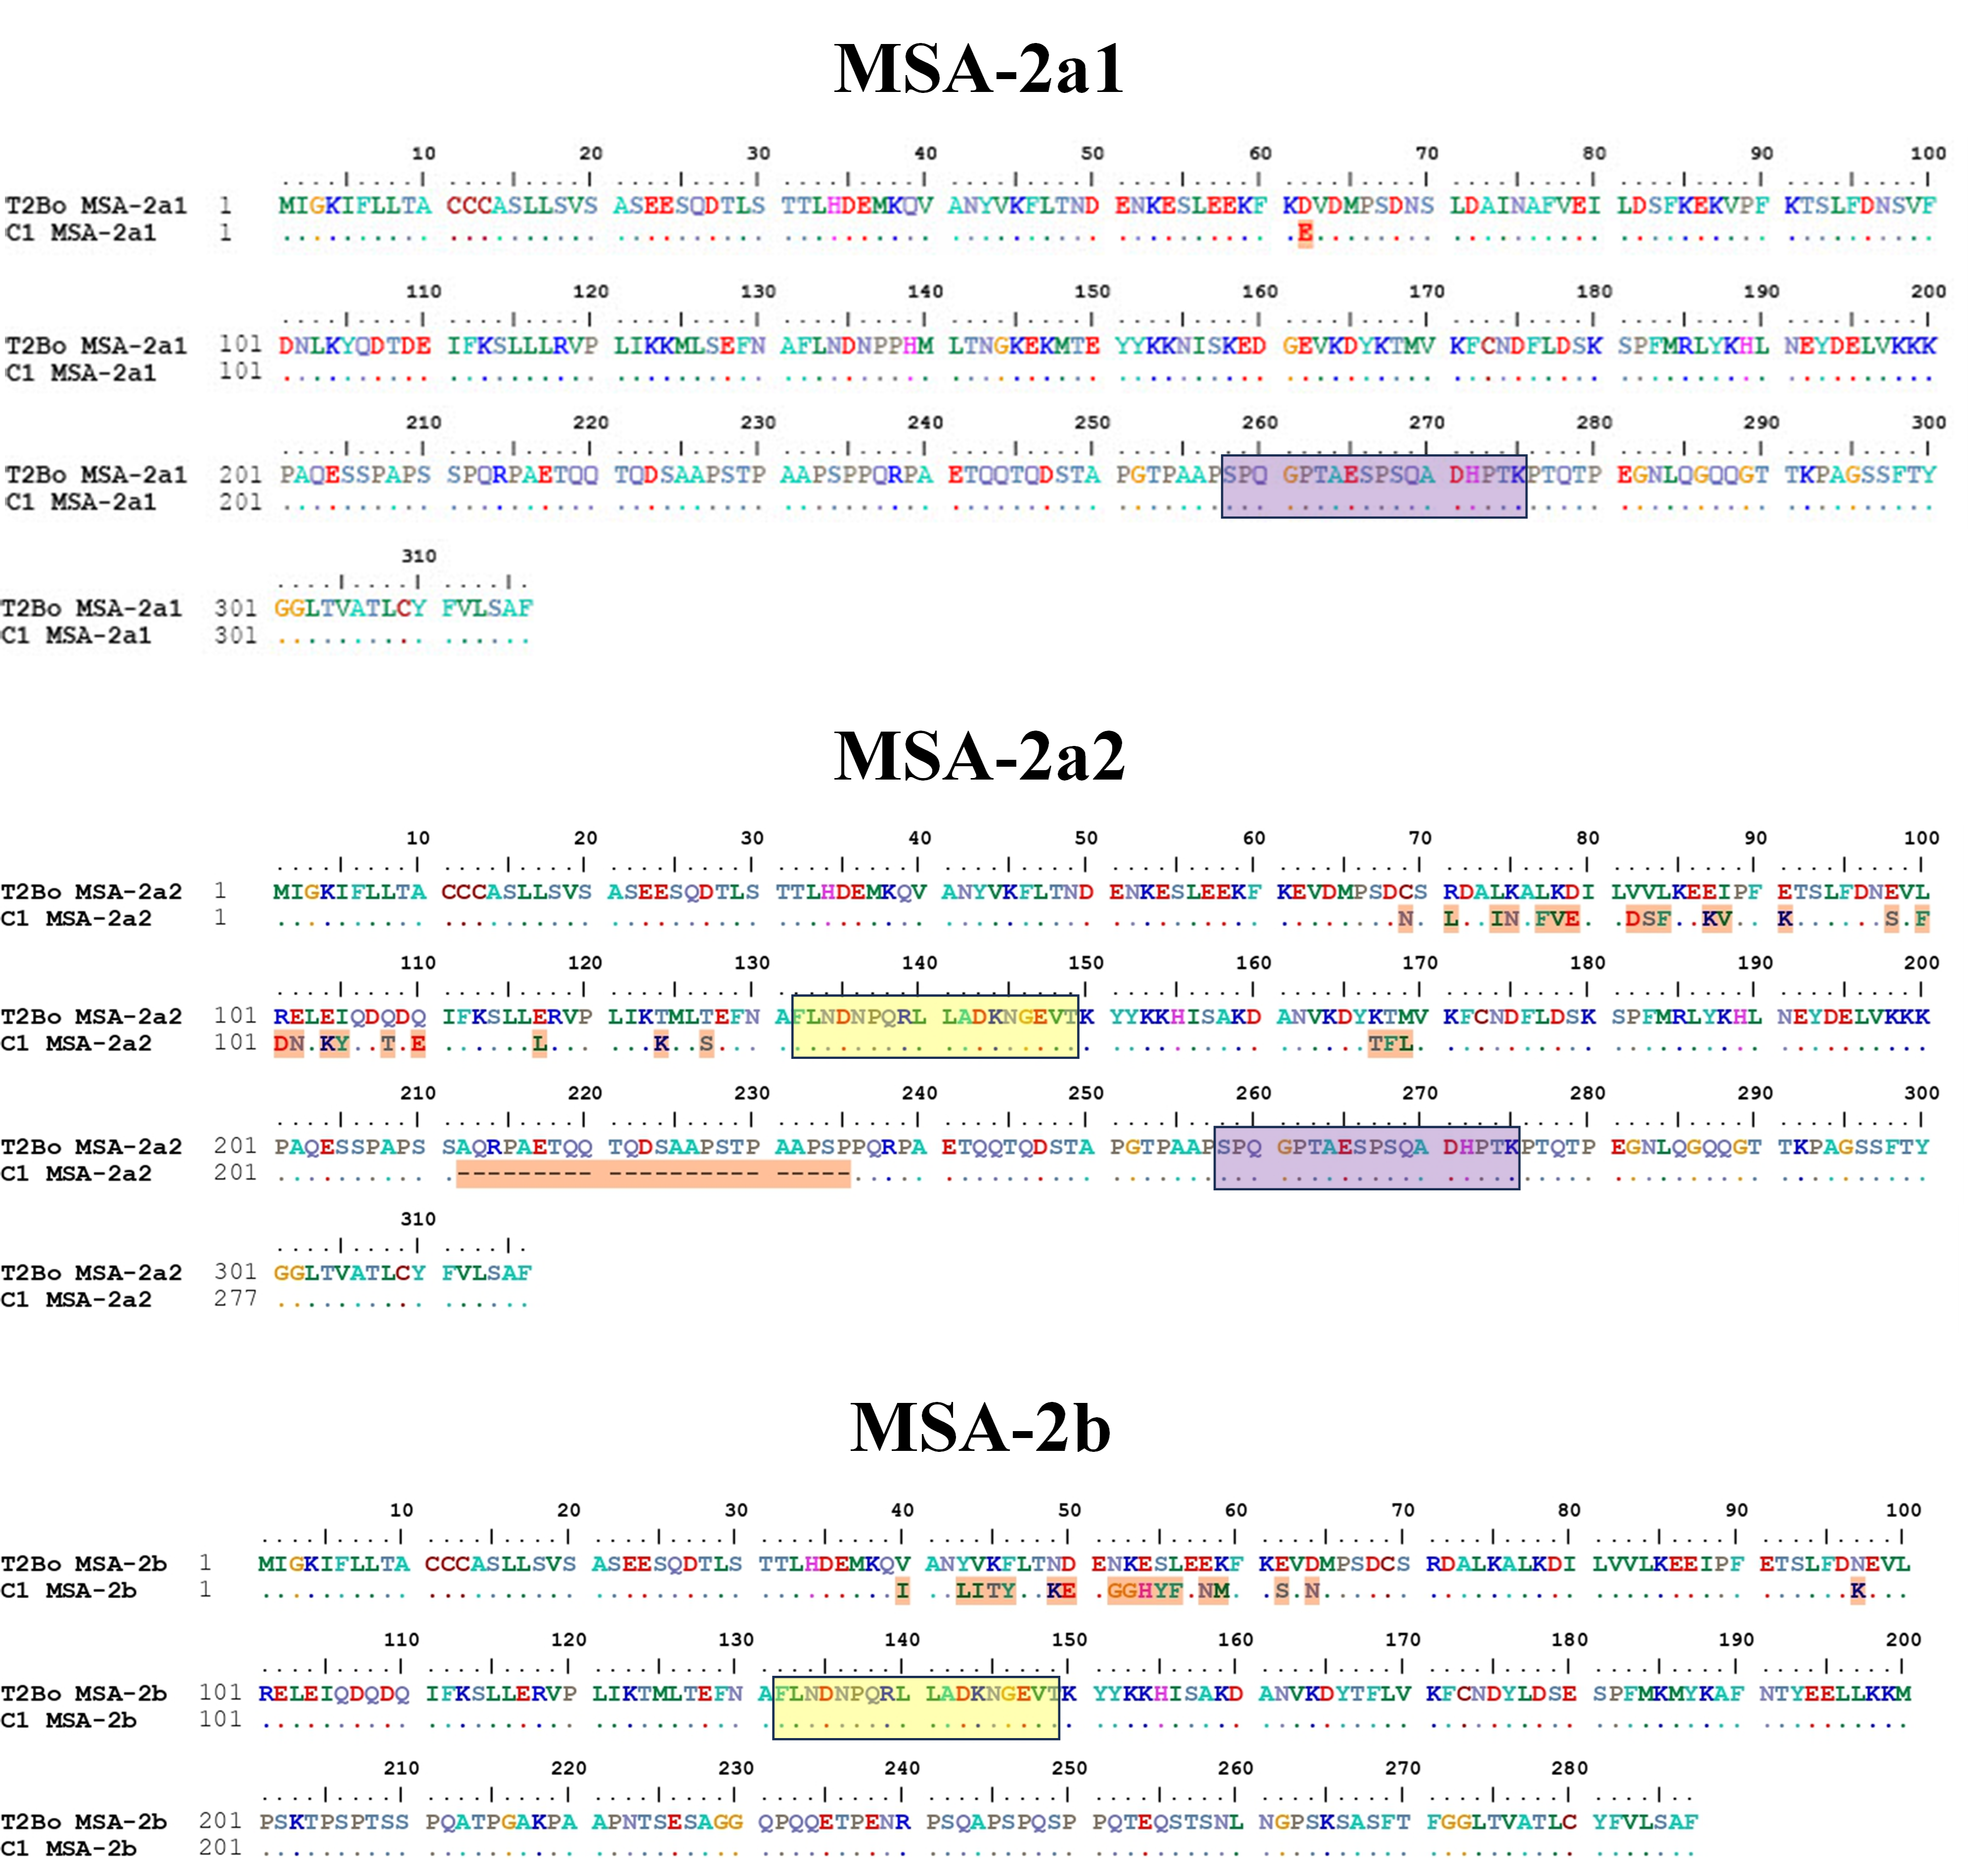


**Fig. S1. Amino acid sequence alignment of MSA-2 peptides from *B. bovis* T2Bo and C1 strains**

Sequences of MSA-2a1 (BBOV_I003010), MSA-2a2 (BBOV_I003000), and MSA-2b (BBOV_I002990) from the T2Bo and C1 strains of *B. bovis* were aligned using Clustal W. Identical residues between the two strains are indicated by dots (·) and amino acid differences in the C1 strain are highlighted in orange. Amino acid sequences highlighted in yellow (MSA-2a2 and MSA-2b) and in violet (MSA-2a2 and MSA-2a1) indicate the peptides used to obtain rabbit antisera Ab-1 and Ab-2, respectively.
